# Supplementary material for: Effects of Allium hookeri on gut microbiome related to growth performance in young broiler chickens
Source: PubMed Central journal article supplement (PMC6953852; doi:10.1371/journal.pone.0226833), 2020-01-10
Supplement: pone.0226833.s001.pdf [file pone.0226833.s001.pdf]

**S1 Table. Results of PERMANOVA of Pair-wise test for combinations groups**

| <b>Pair</b>        | <b>P-value</b> | <b>Pair</b>        | <b>P-value</b> |
|--------------------|----------------|--------------------|----------------|
| Leaf 0.3, Leaf 0.5 | 0.115          | Leaf 0.5, Control  | 0.058          |
| Leaf 0.3, Control  | 0.086          | Leaf 0.5, CS       | 0.027          |
| Leaf 0.3, CS       | 0.056          | Leaf 0.5, Root 0.3 | 0.029          |
| Leaf 0.3, Root 0.3 | 0.028          | Leaf 0.5, Root 0.5 | 0.029          |
| Leaf 0.3, Root 0.5 | 0.229          | CS, Root 0.3       | 0.656          |
| Control, CS        | 0.544          | CS, Root 0.5       | 0.486          |
| Control, Root 0.3  | 0.685          | Root 0.3, Root 0.5 | 0.715          |
| Control, Root 0.5  | 0.837          |                    |                |
